# Supplementary material
Source: publisher site journal article supplement (https://www.dovepress.com/article/supplementary_file/595246/595246%20Supplementary%20Material.docx)
Supplement: Supplementary file 1 [file 595246%20Supplementary%20Material.docx]

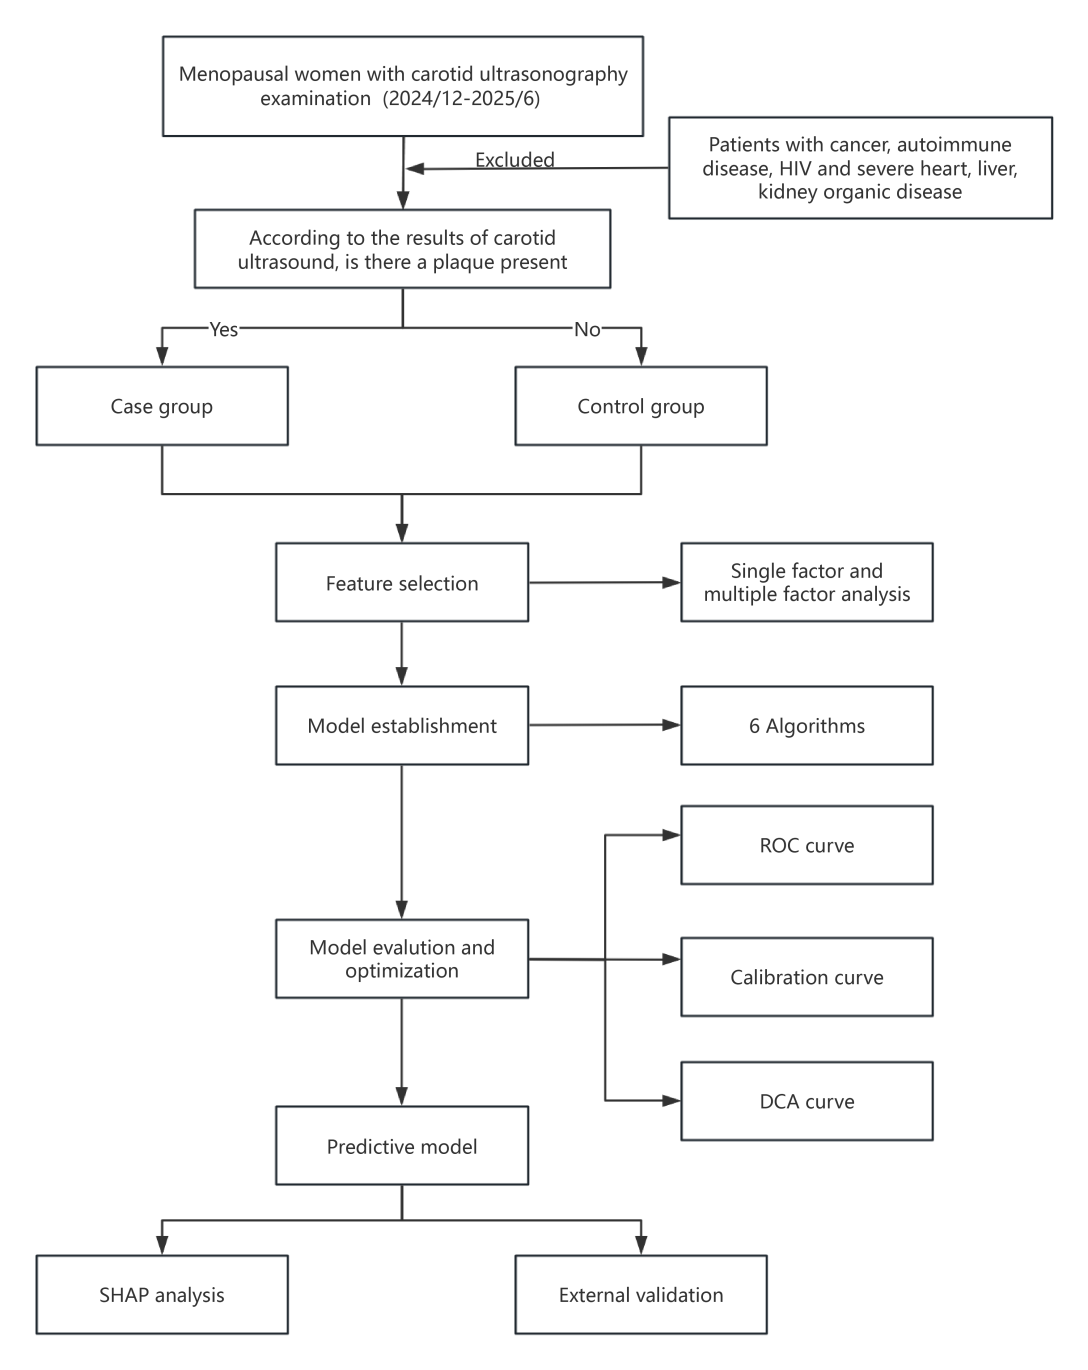


Supplementary Figure 1. Study flowchart.


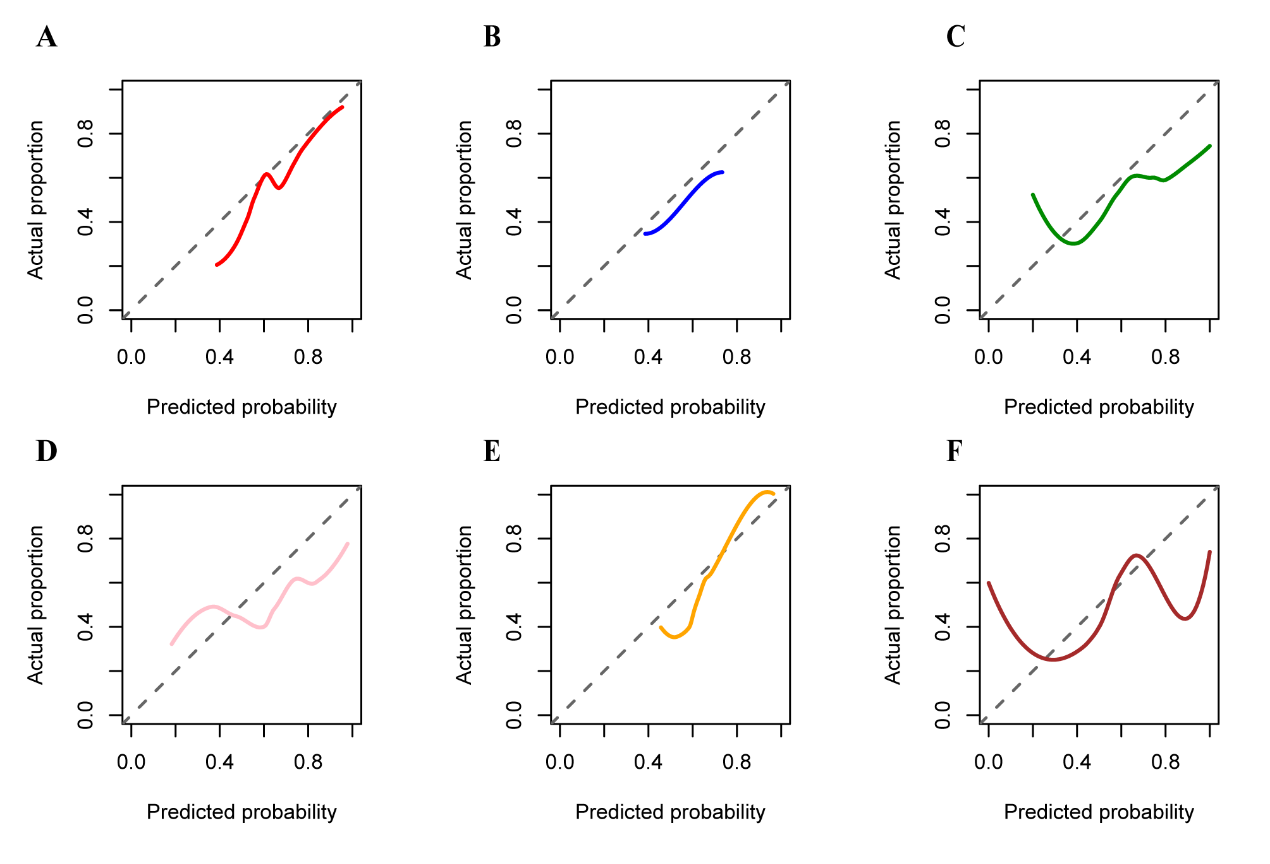


Supplementary Figure 2. Calibration curves of six models.

(A) logistic regression. (B) decision tree. (C) random forest. (D) extreme gradient boosting. (E) support vector machine. (F) neural network.


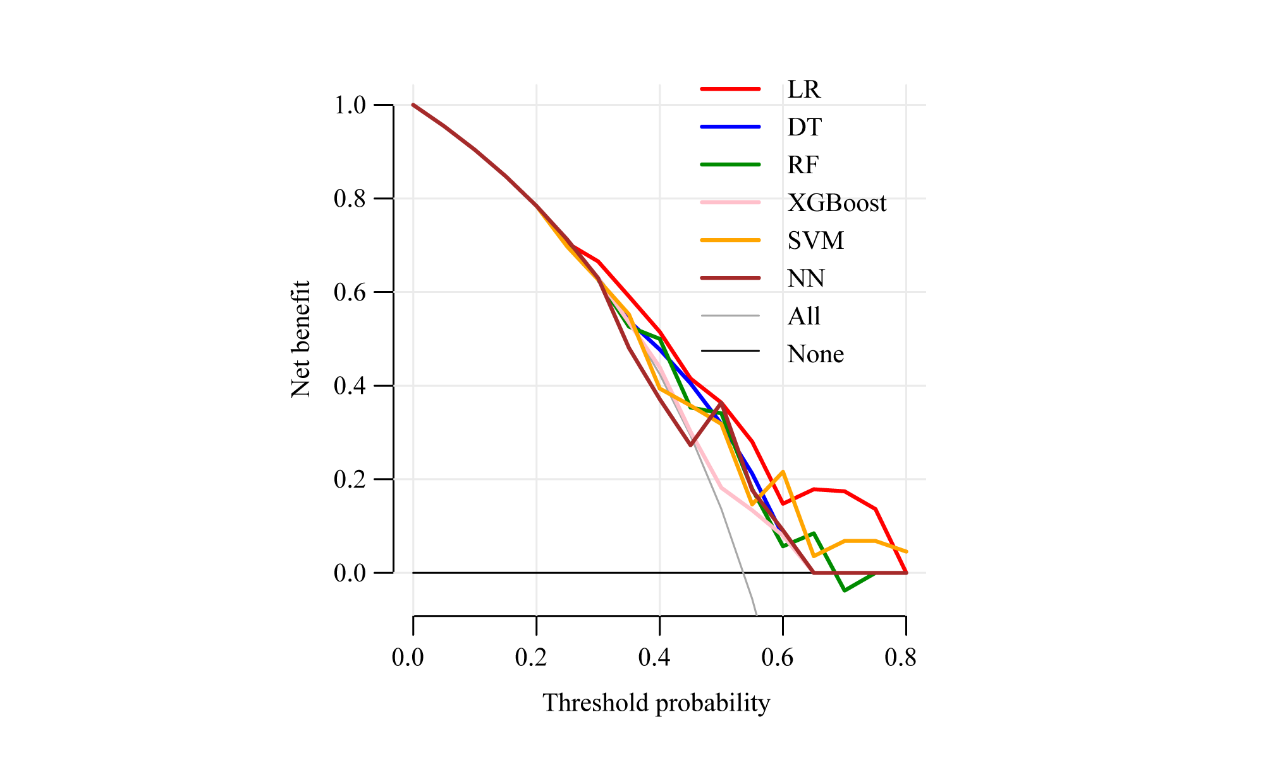


Supplementary Figure 3. Decision curve analysis curves of six models.

Abbreviations: LR, logistic regression; DT, decision tree; RF, random forest; XGBoost, extreme gradient boosting; SVM, support vector machine; NN, neural network.


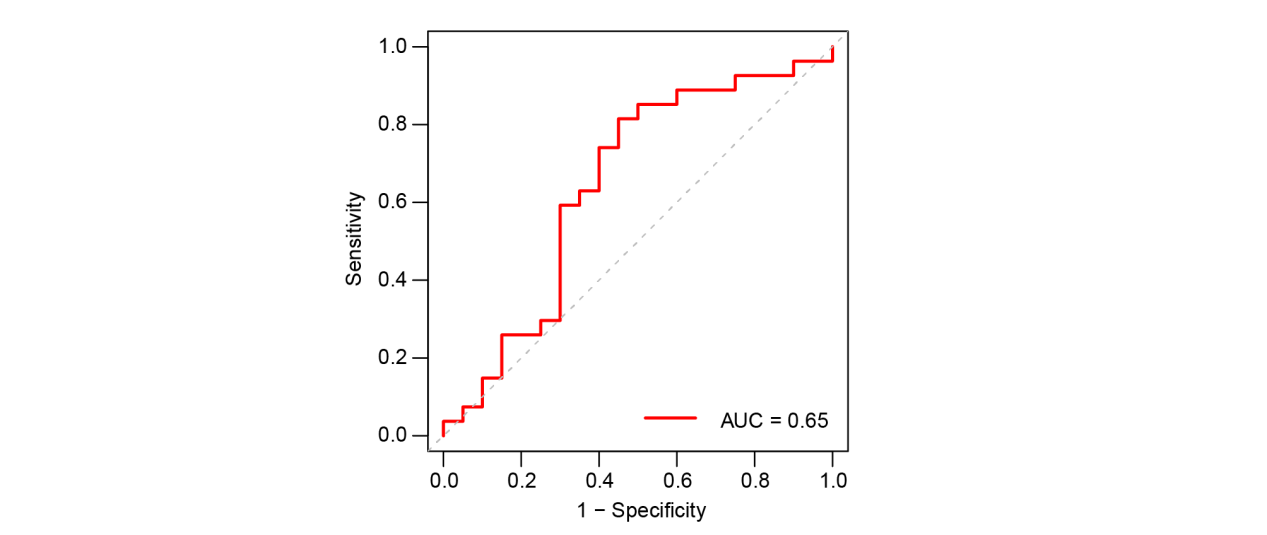


Supplementary Figure 4. The ROC results of external validation set. AUC, area under the curve.

Supplementary Table 1. Polymerase chain reaction primers and amplicons.

| SNP | | Direction | Sequence (5'–3') | Amplicon size (bp) |
| --- | --- | --- | --- | --- |
| rs9340799 | | Forward | TCTGTGTTGTCCATCAGTTCATCT | 125 |
|  | | Reverse | TCAGAACCATTAGAGACCAATGCT |  |
|  |  | |  |  |

Supplementary Table 2. The demographic characteristics of the study population.

| Characteristics | Patients (n=162) | Controls (n=114) | P value |
| --- | --- | --- | --- |
| Age (years) | 61.00 (58.00, 67.00) | 57.00 (54.00, 62.00) | **<0.001** |
| Menopausal.age (years) | 51.00 (50.00, 52.00) | 50.00 (50.00, 52.00) | 0.078 |
| Menopause duration# (years) | 10.00 (6.25, 17.00) | 7.00 (4.00, 12.00) | **<0.001** |
| Height (cm) | 160.00 (156.00, 163.00) | 161.00 (157.00, 165.00) | 0.243 |
| Weight (kg) | 61.00 (55.00, 67.00) | 60.00 (54.50, 67.00) | 0.455 |
| SBP (mmHg) | 133.00 (121.25, 149.00) | 127.00 (114.50, 138.25) | **0.002** |
| DBP (mmHg) | 75.73±10.80 | 75.57±10.55 | 0.902 |
| GLU (mmol/L) | 5.78 (5.35, 6.41) | 5.54 (5.22, 5.96) | **0.002** |
| TC (mmol/L) | 5.70 (5.00, 6.37) | 5.43 (4.98, 6.24) | 0.317 |
| TG (mmol/L) | 1.35 (1.00, 1.92) | 1.23 (0.94, 1.59) | 0.062 |
| LDL (mmol/L) | 3.45 (2.78, 4.00) | 3.17 (2.71, 3.62) | 0.116 |
| HDL (mmol/L) | 1.38 (1.20, 1.55) | 1.38 (1.26, 1.66) | 0.278 |
| Rs9340799 |  |  | 0.075 |
| AA | 114 (70.4%) | 78 (68.4%) |  |
| GA | 46 (28.4%) | 29 (25.4%) |  |
| GG | 2 (1.2%) | 7 (6.1%) |  |

Notes: # The duration of menopause is calculated by subtracting the menopausal age from the age of enrollment. Bold text: *P*<0.05 indicates statistical significance. SBP, systolic blood pressure. DBP, diastolic blood Pressure. GLU, glucose. TC, total cholesterol. TG, triglycerides. LDL, low-density lipoprotein. HDL, high-density lipoprotein.

Supplementary Table 3. Diagnostic performance of model test set.

| model | Sensitivity (95% CI) | Specificity (95% CI) | AUC (95% CI) | DeLong vs LR (P) | Adjusted P* | Brier Score | HL P-value | Calibration Slope |
| --- | --- | --- | --- | --- | --- | --- | --- | --- |
| Logistic regression | 0.750 (0.597-0.868) | 0.526 (0.358-0.690) | 0.709 (0.596–0.821) | — |  | 0.227 | 0.263 | 6.177 |
| Decision tree | 0.796 (0.647-0.902) | 0.447 (0.286-0.617) | 0.621 (0.521–0.722) | 0.079 | 0.395 | 0.240 | NA# | 3.294 |
| Random forest | 0.705 (0.548-0.832) | 0.526 (0.358-0.690) | 0.642 (0.521–0.764) | 0.431 | 1.000 | 0.255 | 0.0006 | 2.641 |
| eXtreme Gradient Boosting | 0.636 (0.572-0.850) | 0.526 (0.154-0.459) | 0.591 (0.467–0.716) | 0.044 | 0.220 | 0.275 | 0.0027 | 1.357 |
| Support vector machine | 0.773 (0.622-0.885) | 0.368 (0.218-0.540) | 0.651 (0.531–0.771) | 0.128 | 0.640 | 0.242 | 0.267 | 7.800 |
| Neural network | 0.455 (0.304-0.612) | 0.737 (0.569-0.866) | 0.657 (0.537–0.777) | 0.281 | 1.000 | 0.294 | <0.001 | 1.275 |

Notes: # Decision tree has only 2 terminal nodes, HL test is not applicable. *Bonferroni-adjusted P-values for five pairwise comparisons (adjusted α=0.01). Adjusted P = P × 5, capped at 1.000. AUC, area under the curve.

Supplementary Table 4: Comparison of demographic and clinical characteristics between the development and external validation cohorts.

| Characteristics | Development cohort (n=276) | External validation (n=47) | P |
| --- | --- | --- | --- |
| Age (years) | 61 (55, 66) | 60 (56, 67) | 0.755 |
| SBP (mmHg) | 131 (118, 143) | 133 (122, 143) | 0.427 |
| GLU (mmol/L) | 5.66 (5.30, 6.21) | 5.67 (5.33, 6.74) | 0.316 |
| CAS, n (%) | 162 (58.7%) | 27 (57.4%) | 0.872 |
| rs9340799, n (%) |  |  | 0.087 |
| AA | 192 (69.6%) | 40 (85.1%) |  |
| GA | 75 (27.2%) | 7 (14.9%) |  |
| GG | 9 (3.3%) | 0 (0.0%) |  |

SBP, systolic blood pressure. GLU, glucose. CAS, carotid atherosclerosis.

Supplementary Table 5: Logistic regression model performance on the test set and external validation set.

| Metric | Test set (n=82) | External validation (n=47) |
| --- | --- | --- |
| AUC (95% CI) | 0.71 (0.60–0.82) | 0.65 (0.48–0.82) |
| Sensitivity (95% CI) | 0.68 (0.53–0.81) | 0.82 (0.62–0.94) |
| Specificity (95% CI) | 0.66 (0.48–0.81) | 0.55 (0.32–0.77) |
| PPV (95% CI) | 0.73 (0.57–0.85) | 0.71 (0.52–0.86) |
| NPV (95% CI) | 0.61 (0.43–0.76) | 0.69 (0.41–0.89) |
| Accuracy (95% CI) | 0.67 (0.56–0.77) | 0.70 (0.55–0.83) |

AUC, area under the curve. PPV: positive predictive value. NPV: negative predictive value.
